# Supplementary material
Source: publisher site journal article supplement (https://www.spandidos-publications.com/1307/downloadSupplementary)

Figure S1. Age vs. candidate Log2 FPKM gene expression comparison. RET expression between patients <18 months and >18 months. RET, GFR  $\alpha$ 2 and NTRK1 expressions were identified as significant. NTRK, neurotrophic receptor tyrosine kinase.

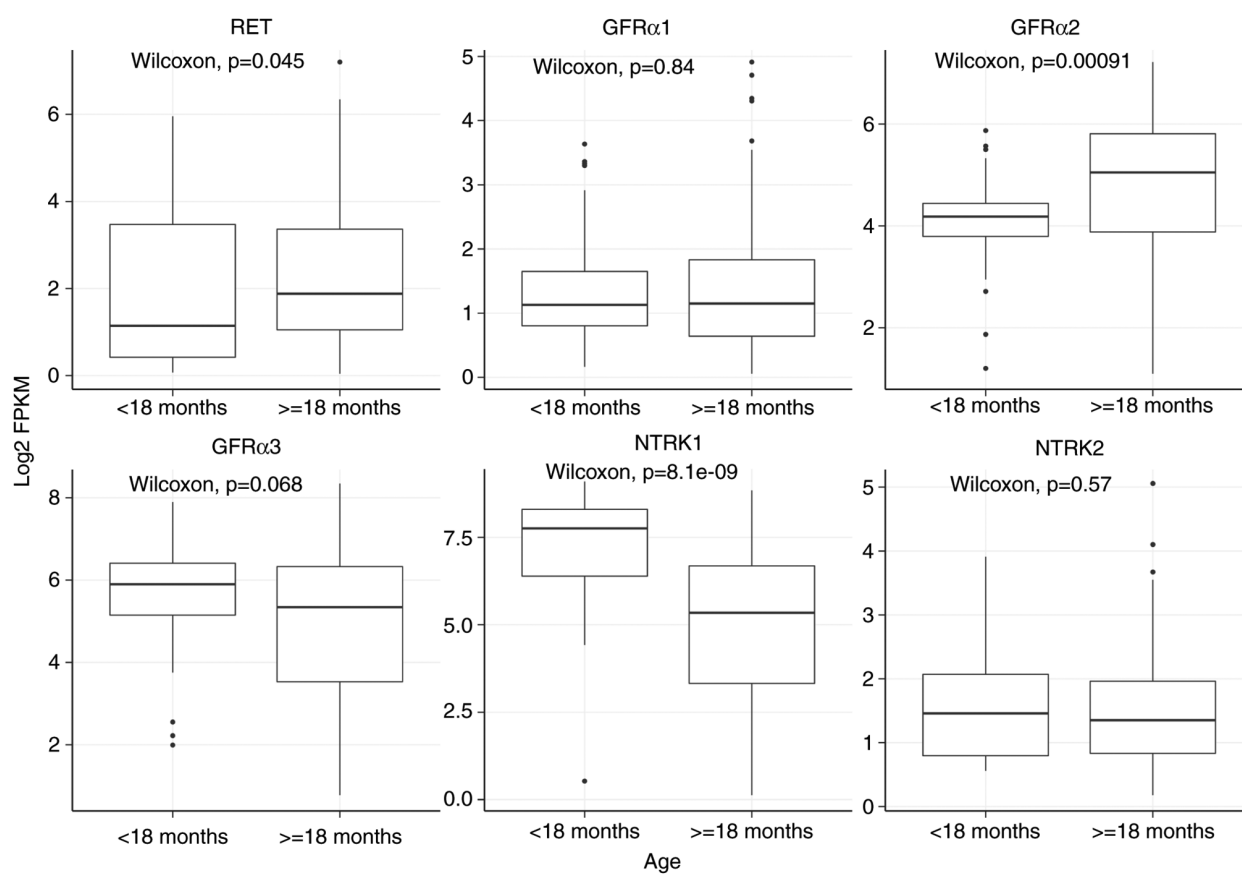

Supplement: Supplementary file 1 [file downloadSupplementary]
